# Supplementary material for: The diagnostic and prognostic value of CHFR hypermethylation in colorectal cancer, a meta-analysis and literature review
Source: PubMed Central journal article supplement (PMC5687676; doi:10.18632/oncotarget.19408), 2017-07-20
Supplement: oncotarget-08-89142-s001.pdf [file oncotarget-08-89142-s001.pdf]

# The diagnostic and prognostic value of *CHFR* hypermethylation in colorectal cancer, a meta-analysis and literature review

## SUPPLEMENTARY MATERIALS

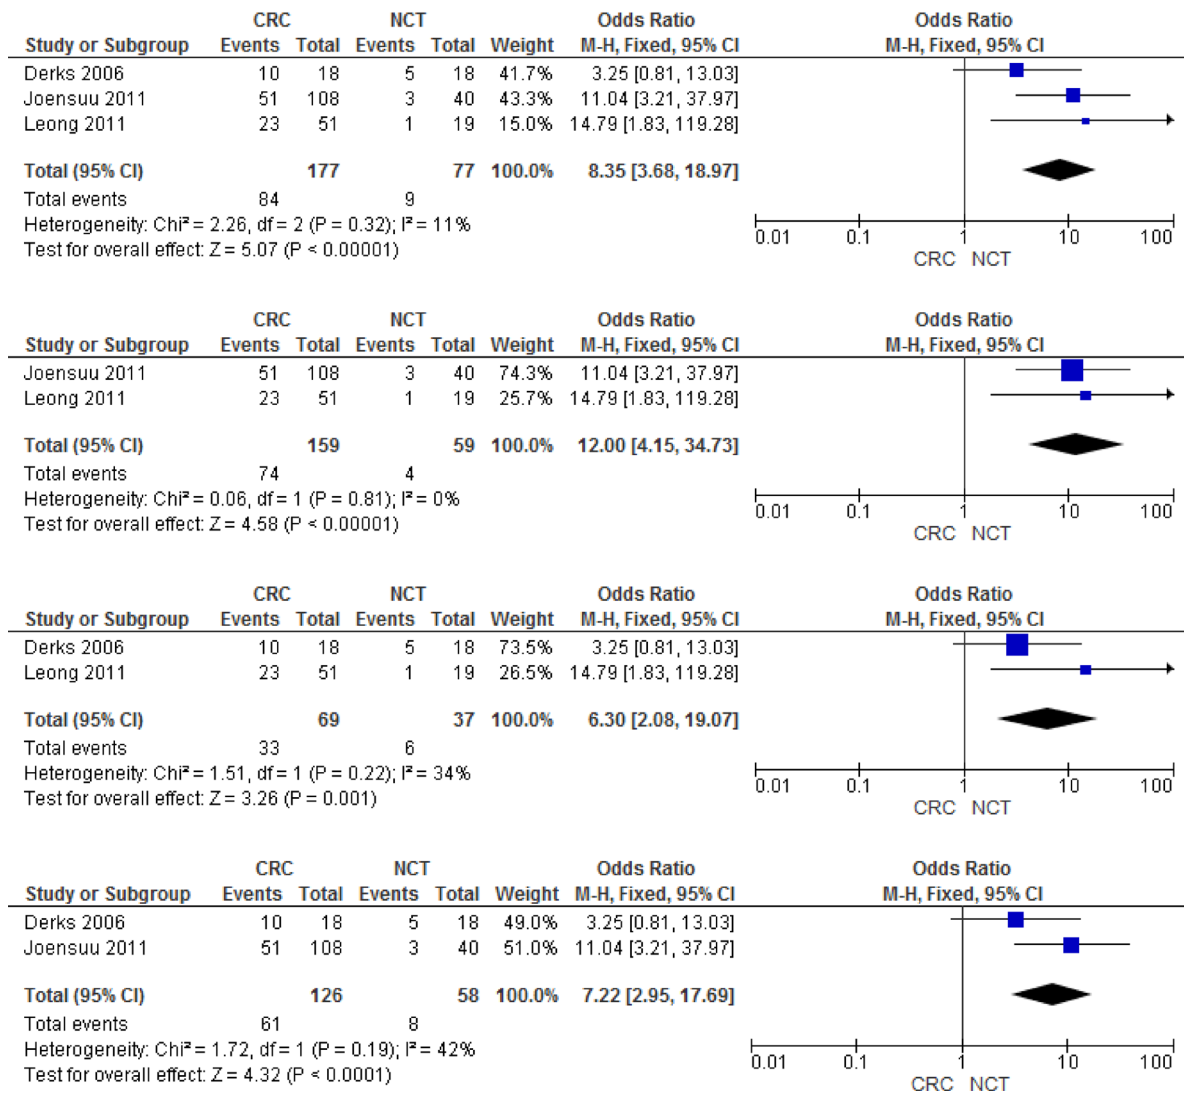

Supplementary Figure 1: The sensitivity analysis of *CHFR* promoter hypermethylation in CRC and normal colorectal tissue.

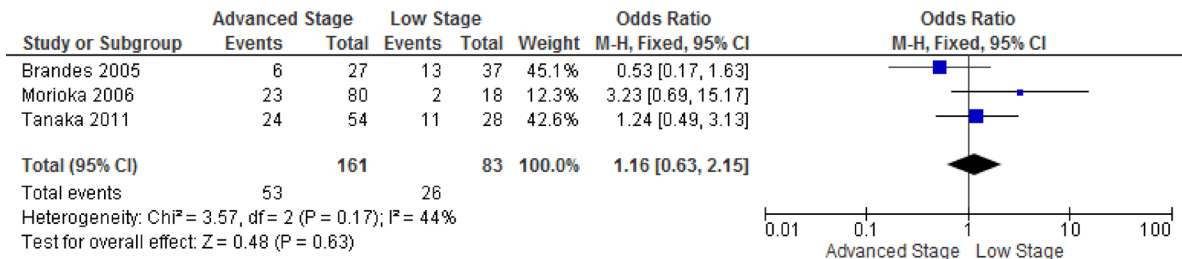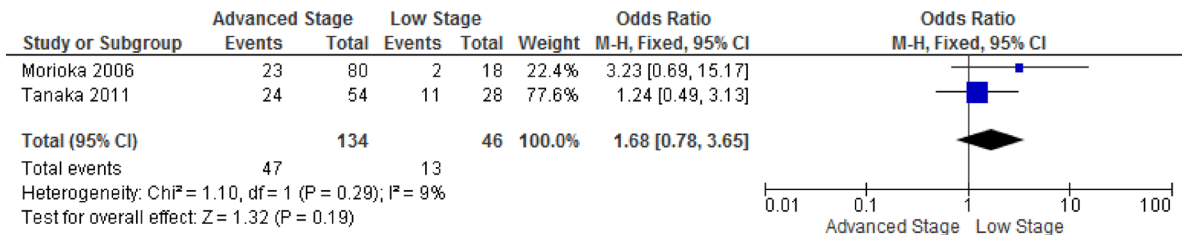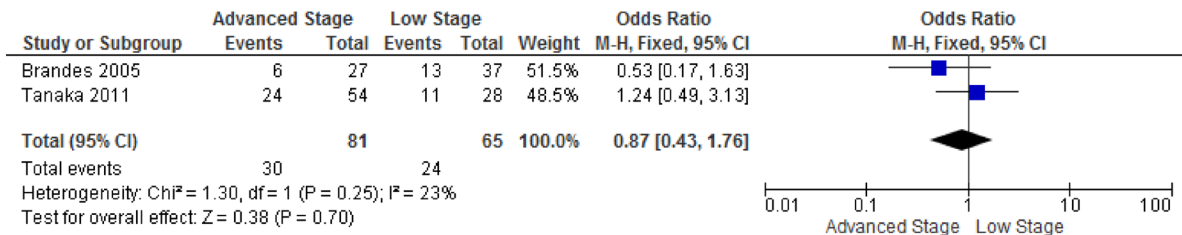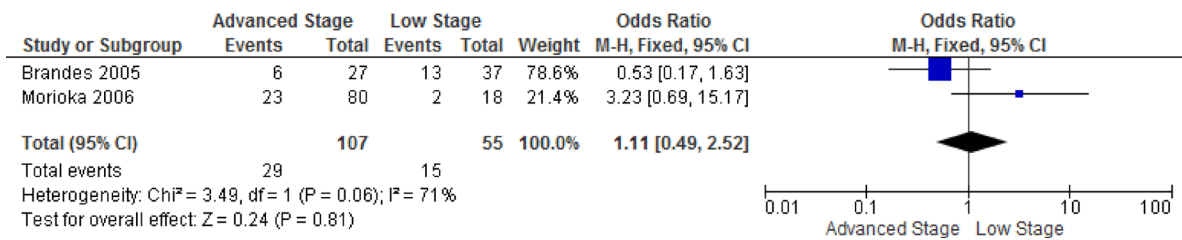

**Supplementary Figure 2: The sensitivity of analysis of *CHFR* promoter hypermethylation in stage III/IV and stage I/II of CRC.**
